# Supplementary material for: Common Starlings (Sturnus vulgaris) increasingly select for grazed areas with increasing distance-to-nest
Source: PubMed Central journal article supplement (PMC5542446; doi:10.1371/journal.pone.0182504), 2017-08-03

Supporting information for the paper: **Common Starlings (*Sturnus vulgaris*) increasingly selects for grazed areas with increasing distance-to-nest**

Henning Heldbjerg, Anthony D. Fox, Peder V. Thellesen, Lars Dalby & Peter Sunde.

Plos One (2017)

This document contains maps of the ringing site and the surrounding fields indicating the different crops and the foraging positions of 17 different tagged Starlings tracked during May 2015 and 2016.

# S1-2016

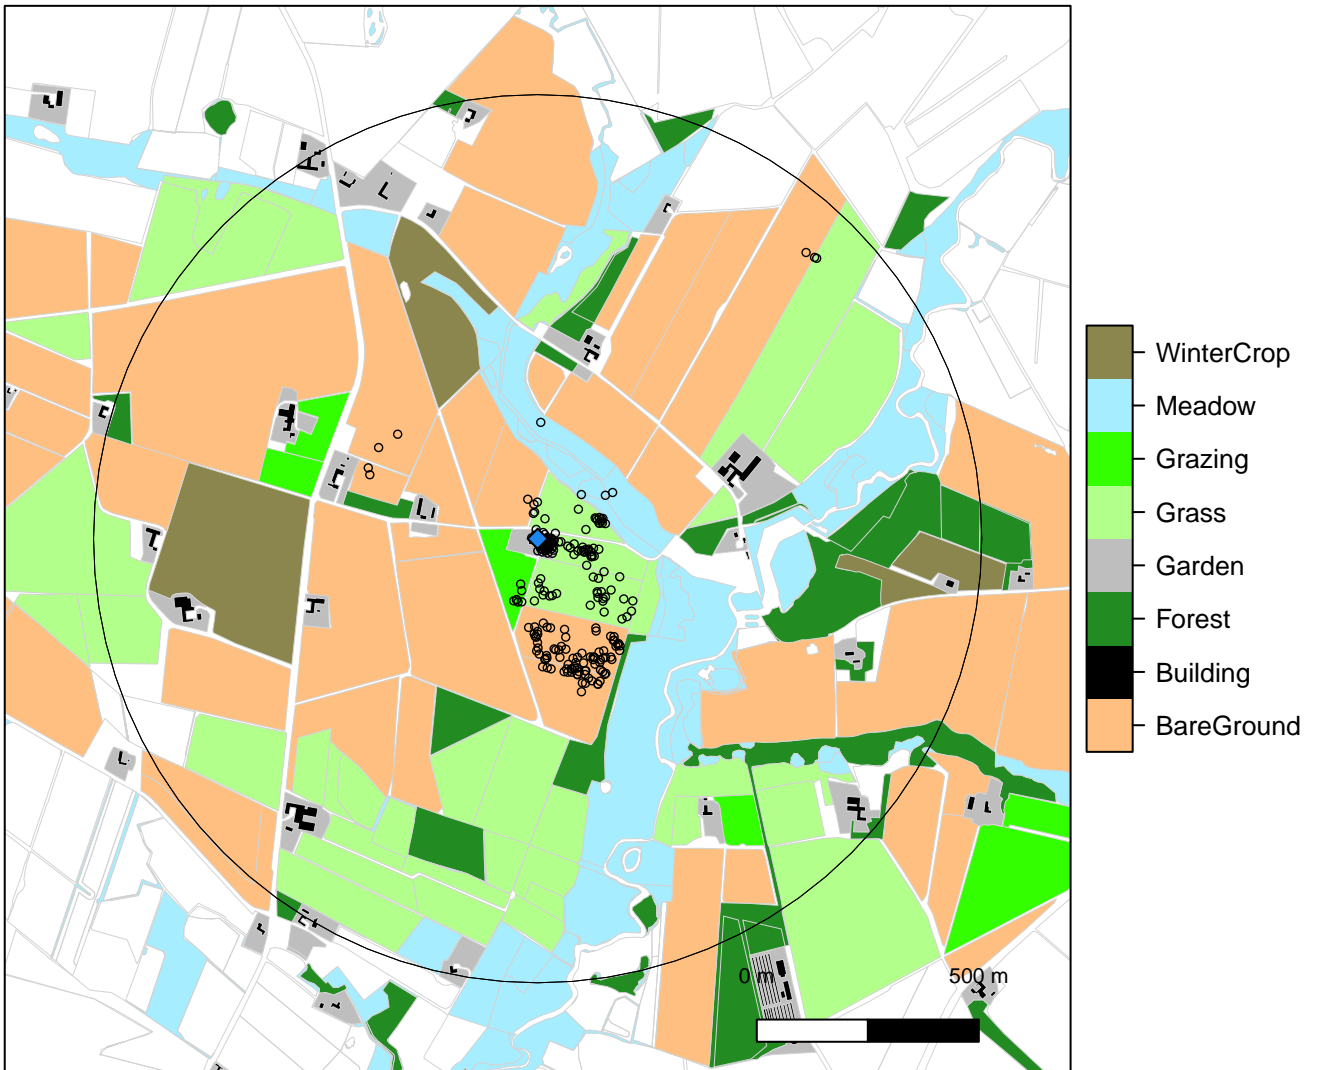

# S10-2015

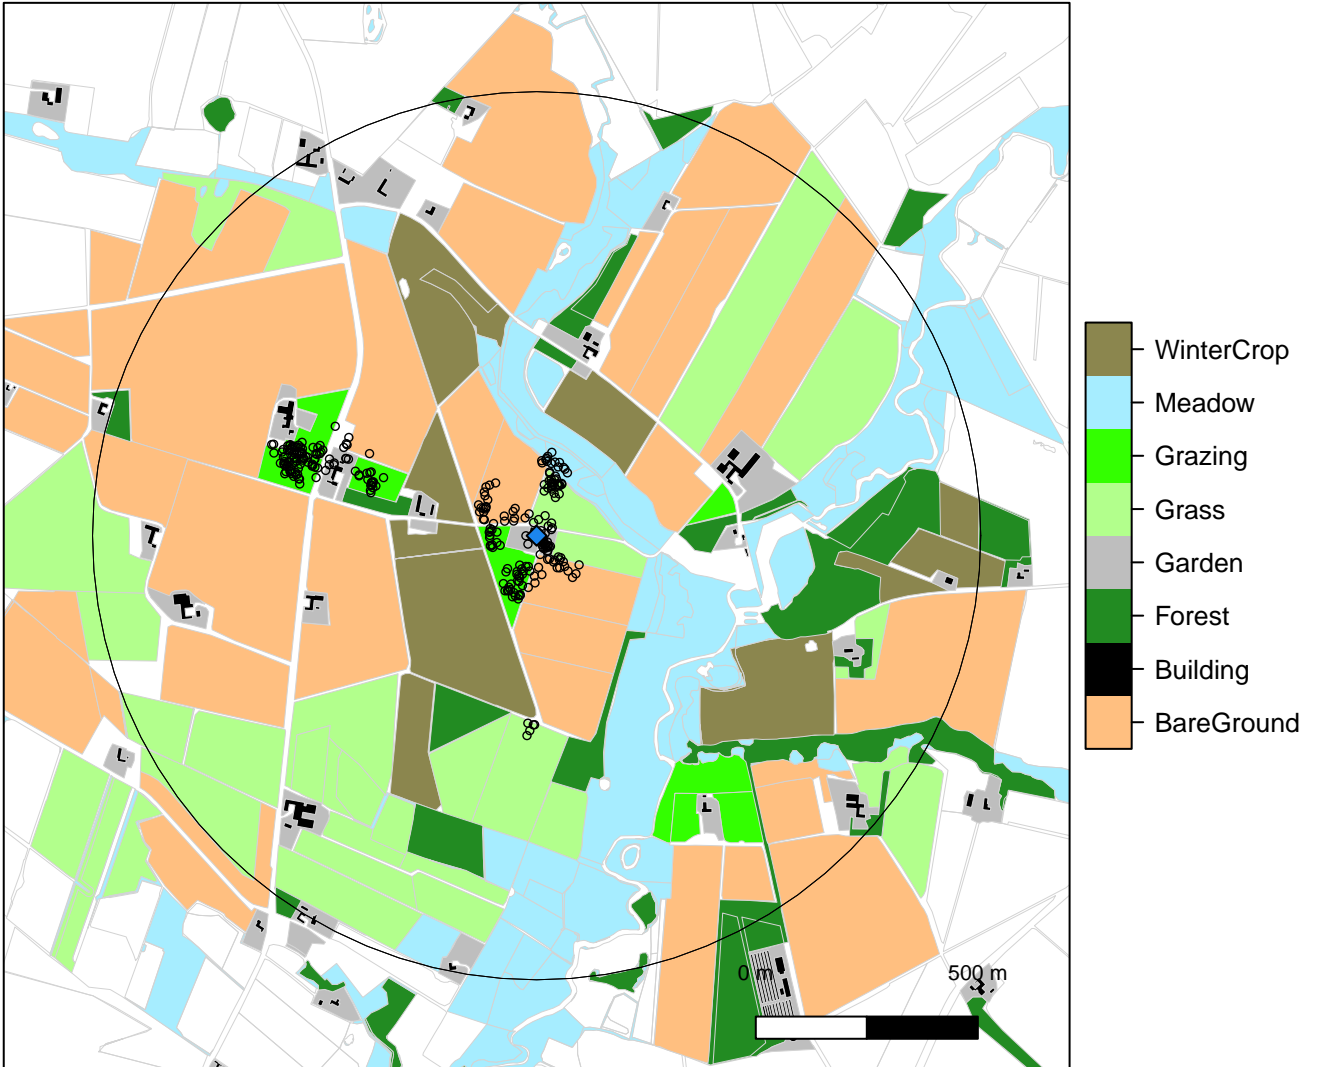

S11-2016

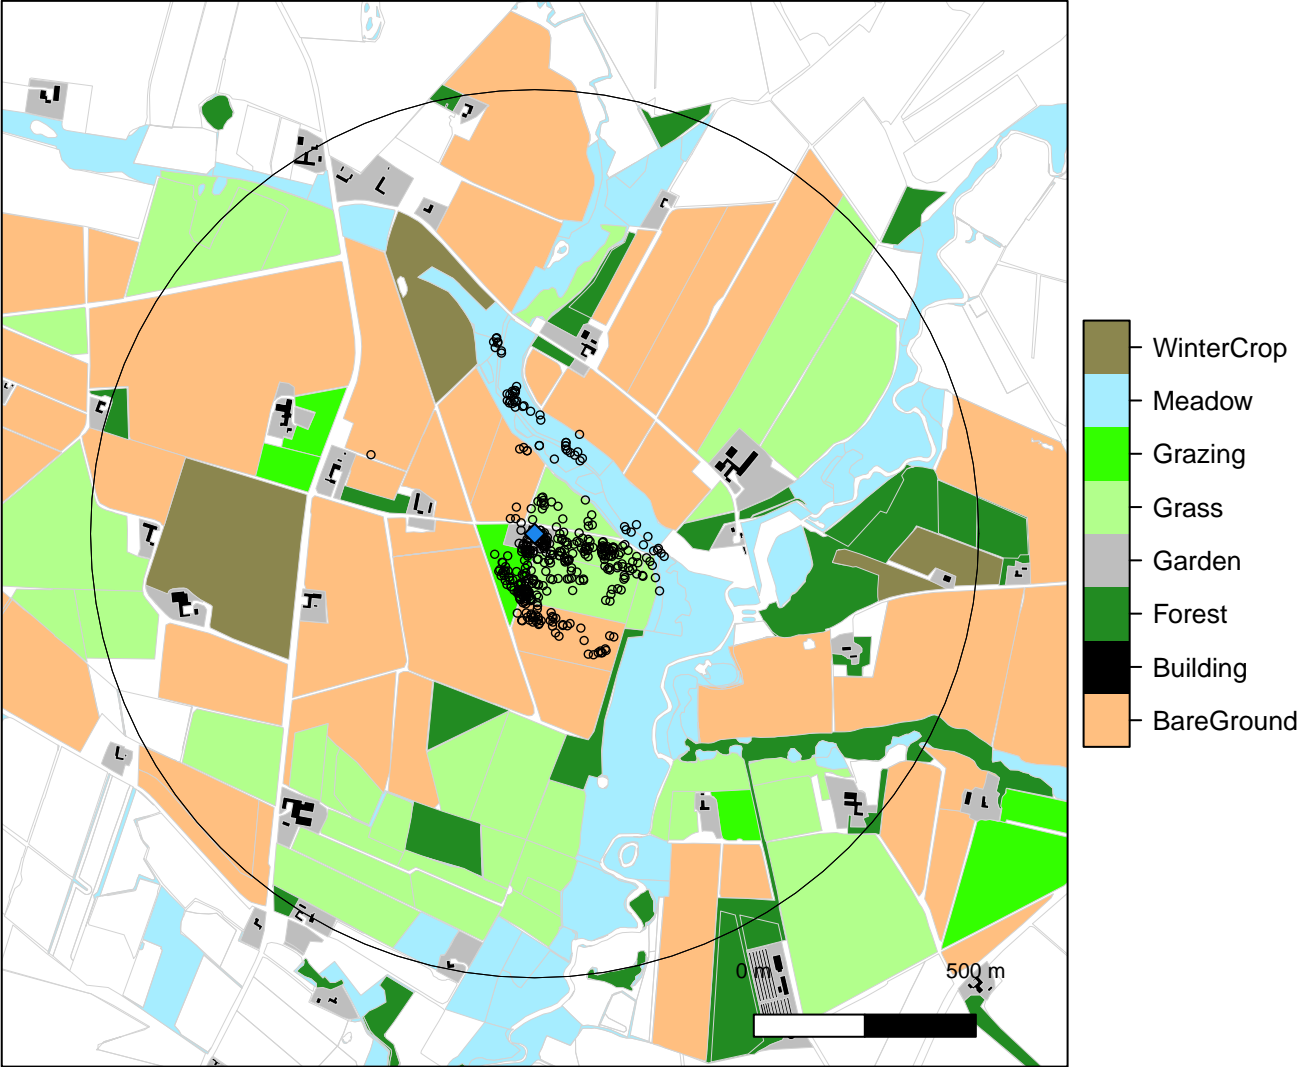

# S12-2016

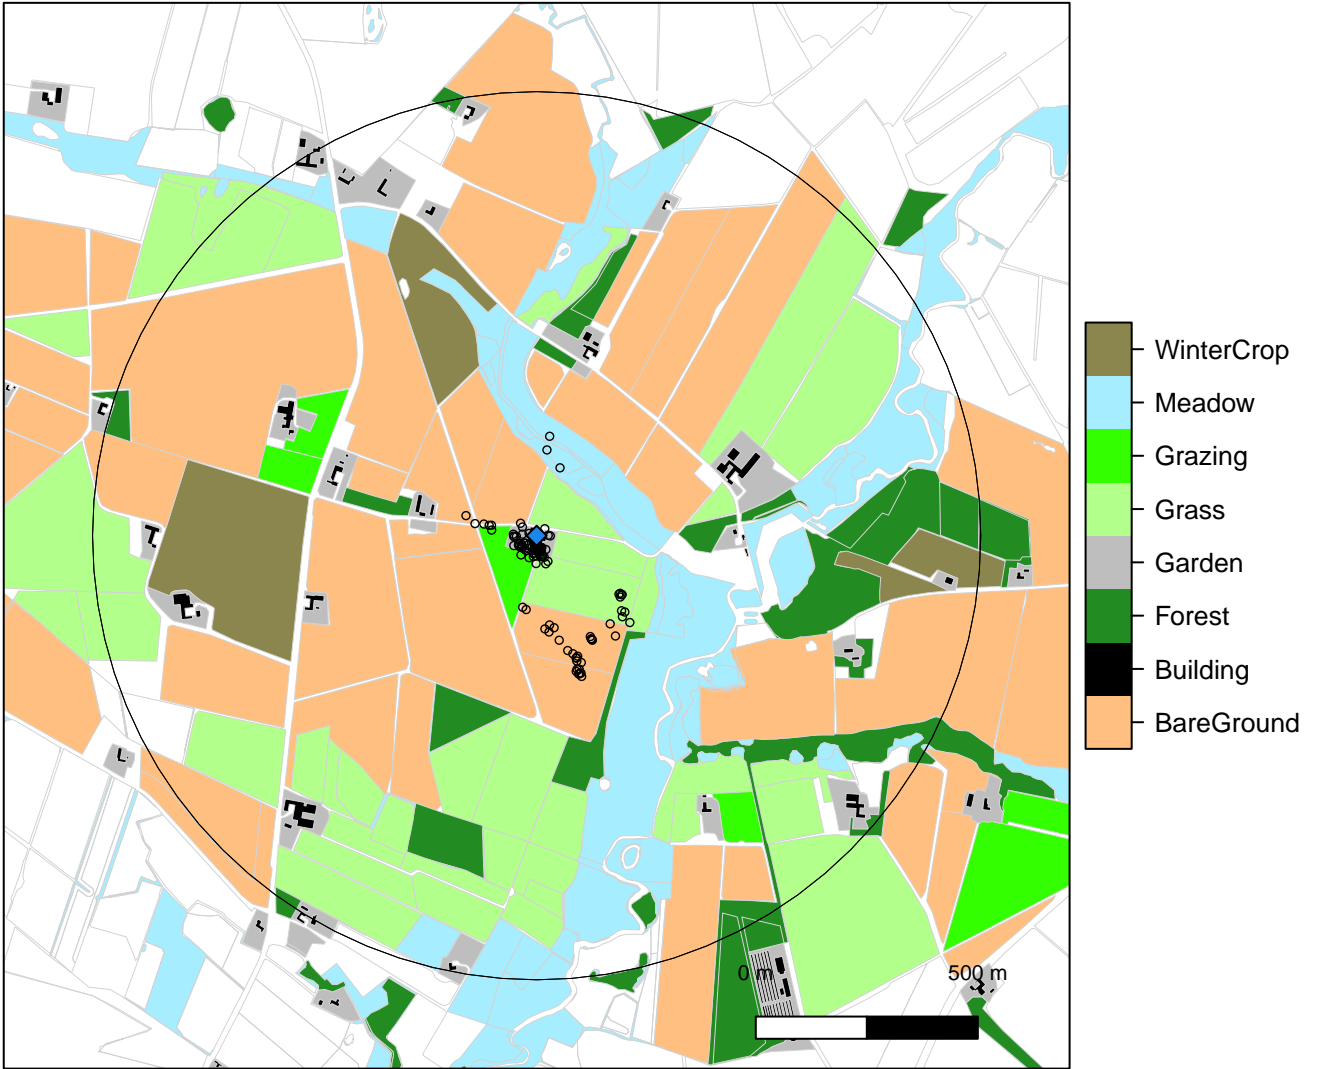

S13-2016

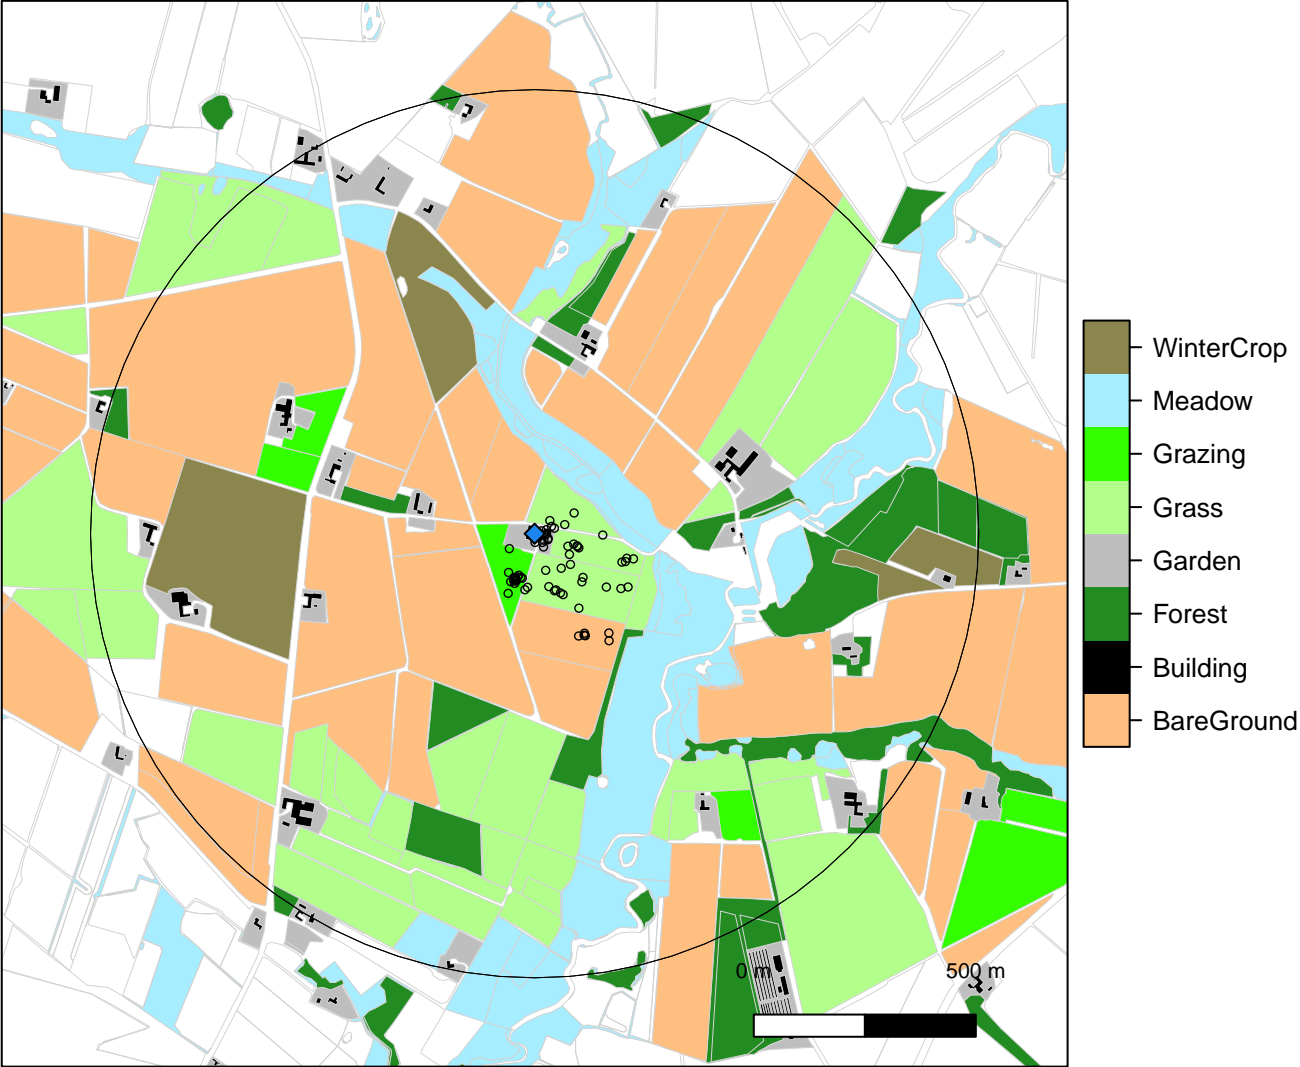

S14-2016

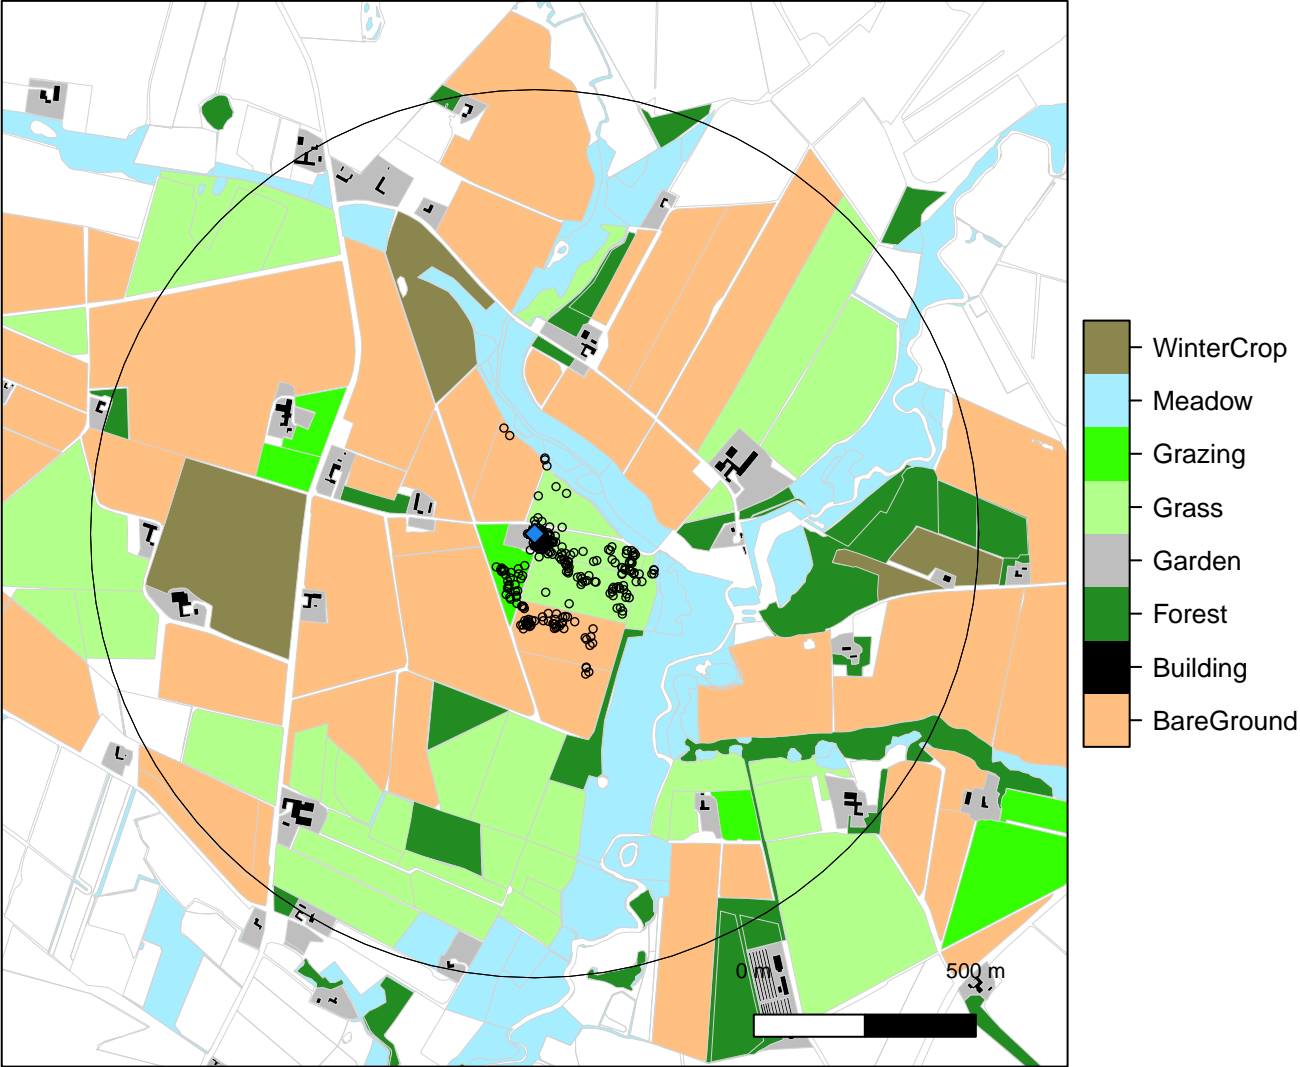

S17-2016

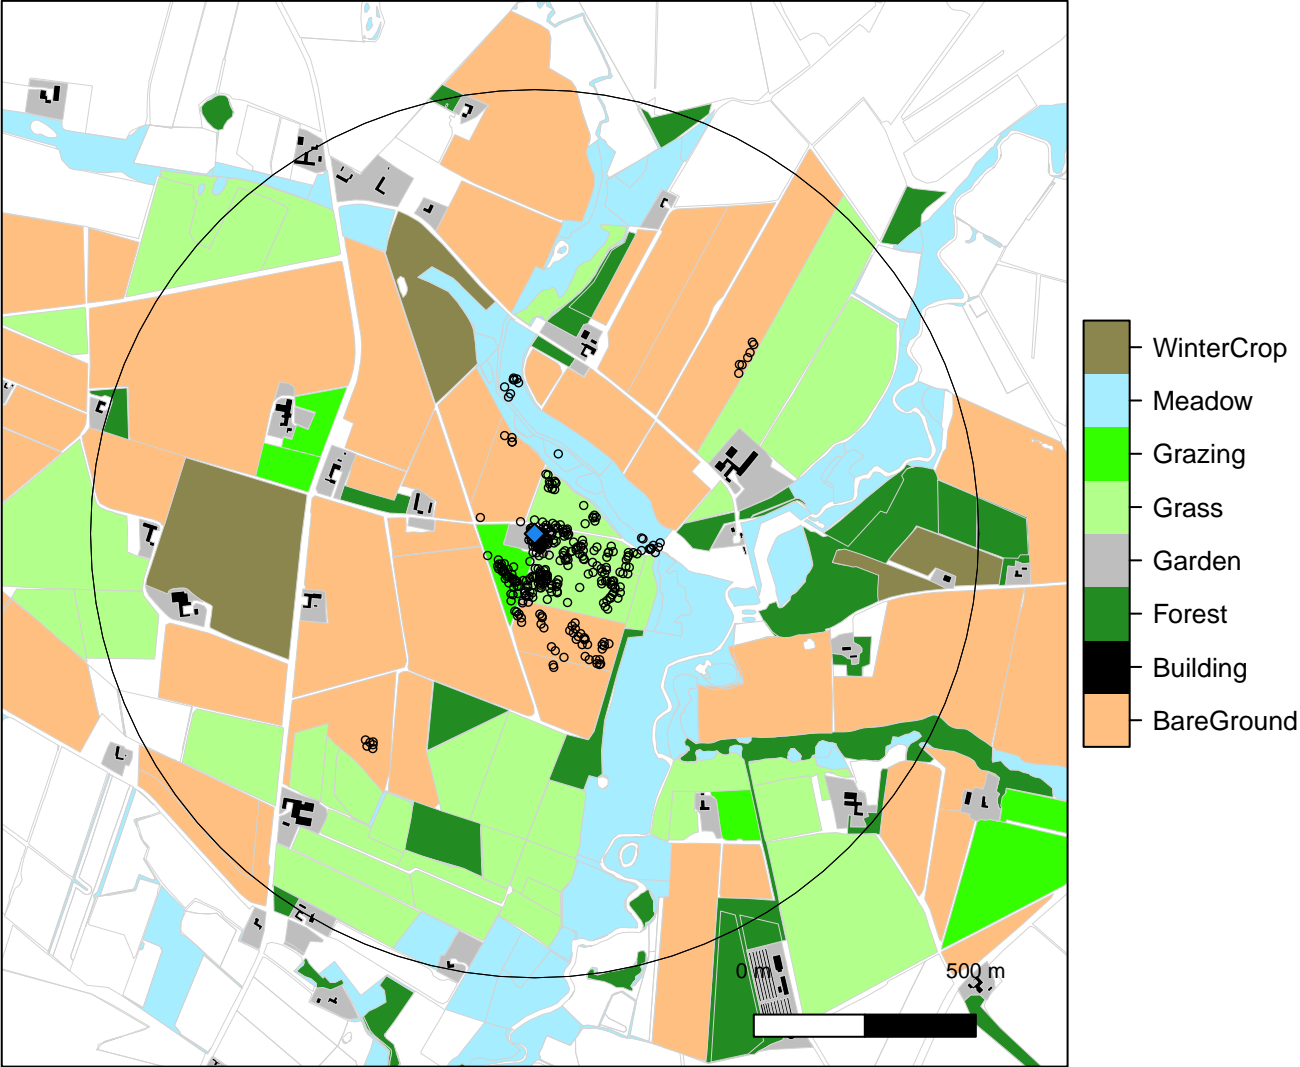



# S2-2015

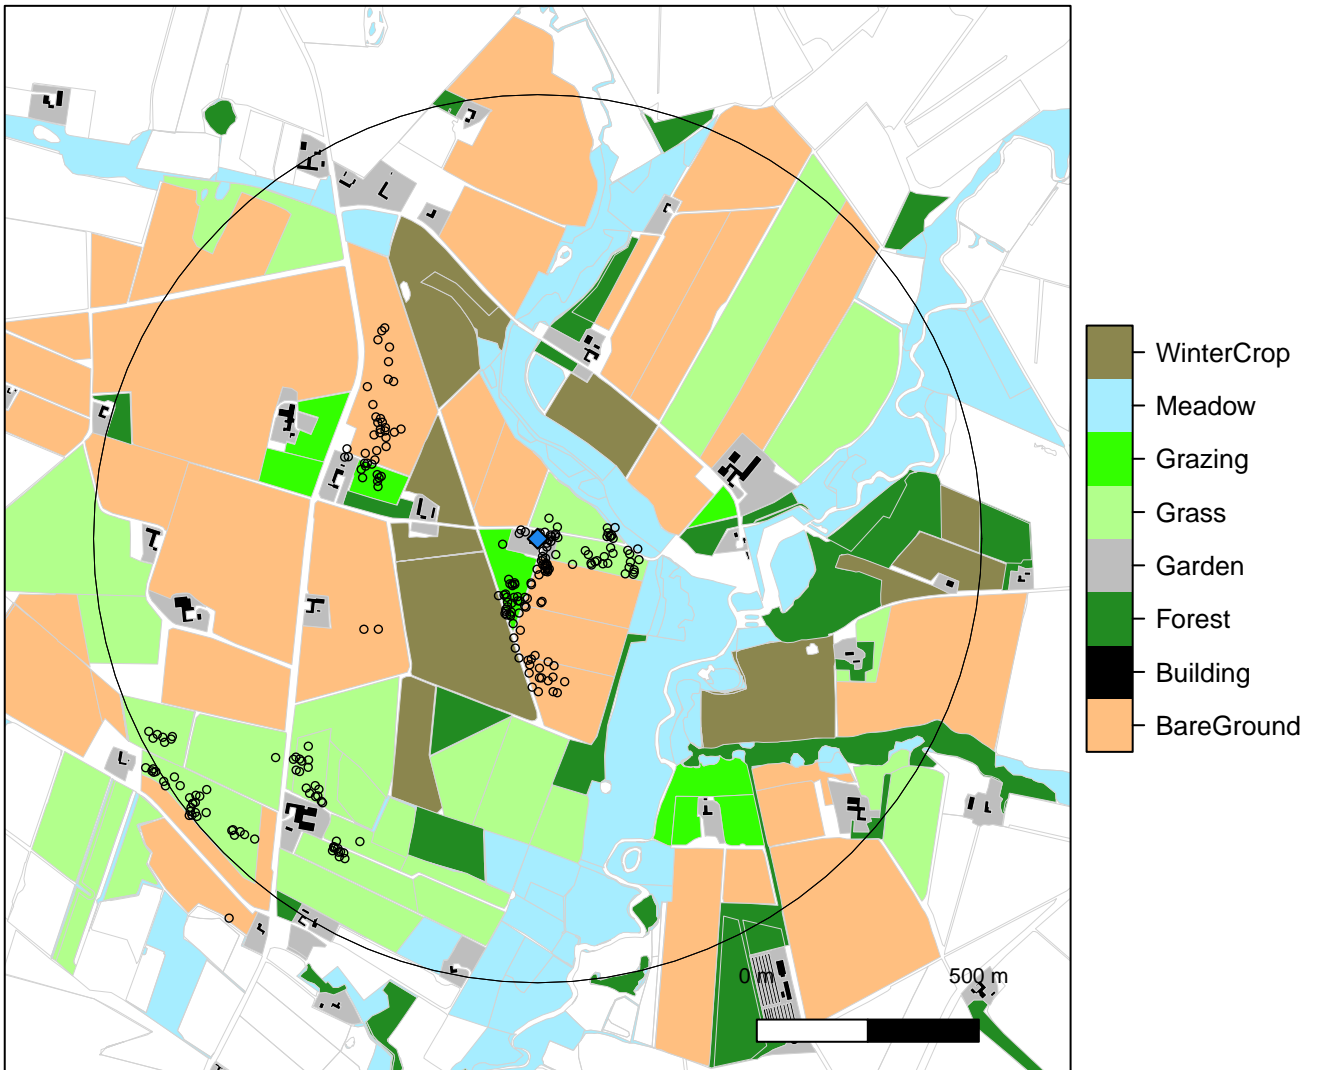

# S3-2015

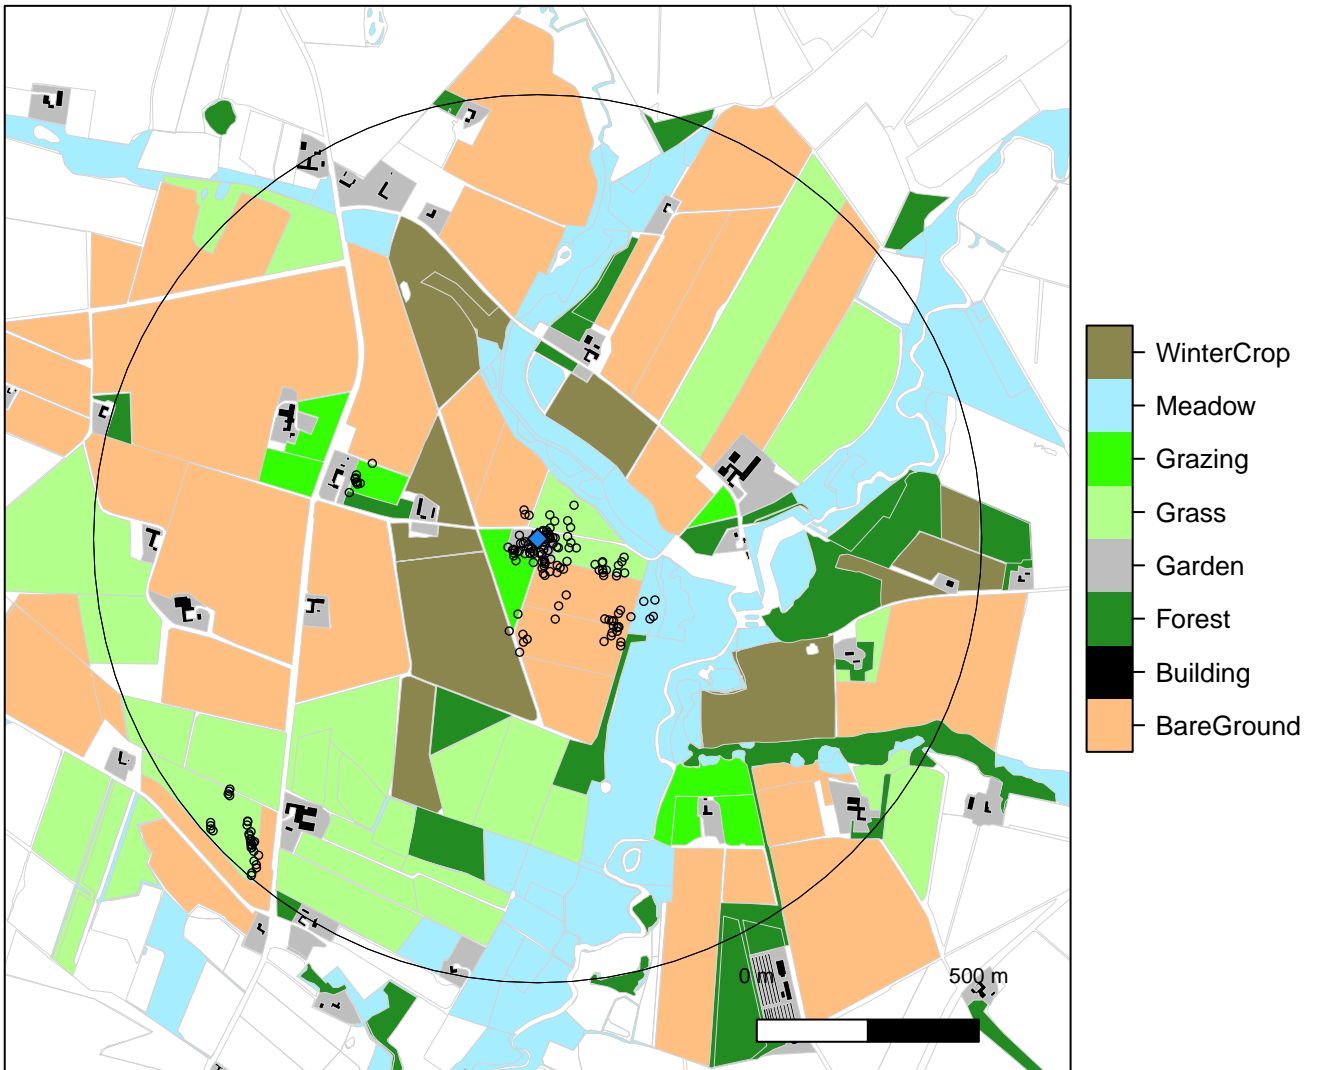

S4a-2016

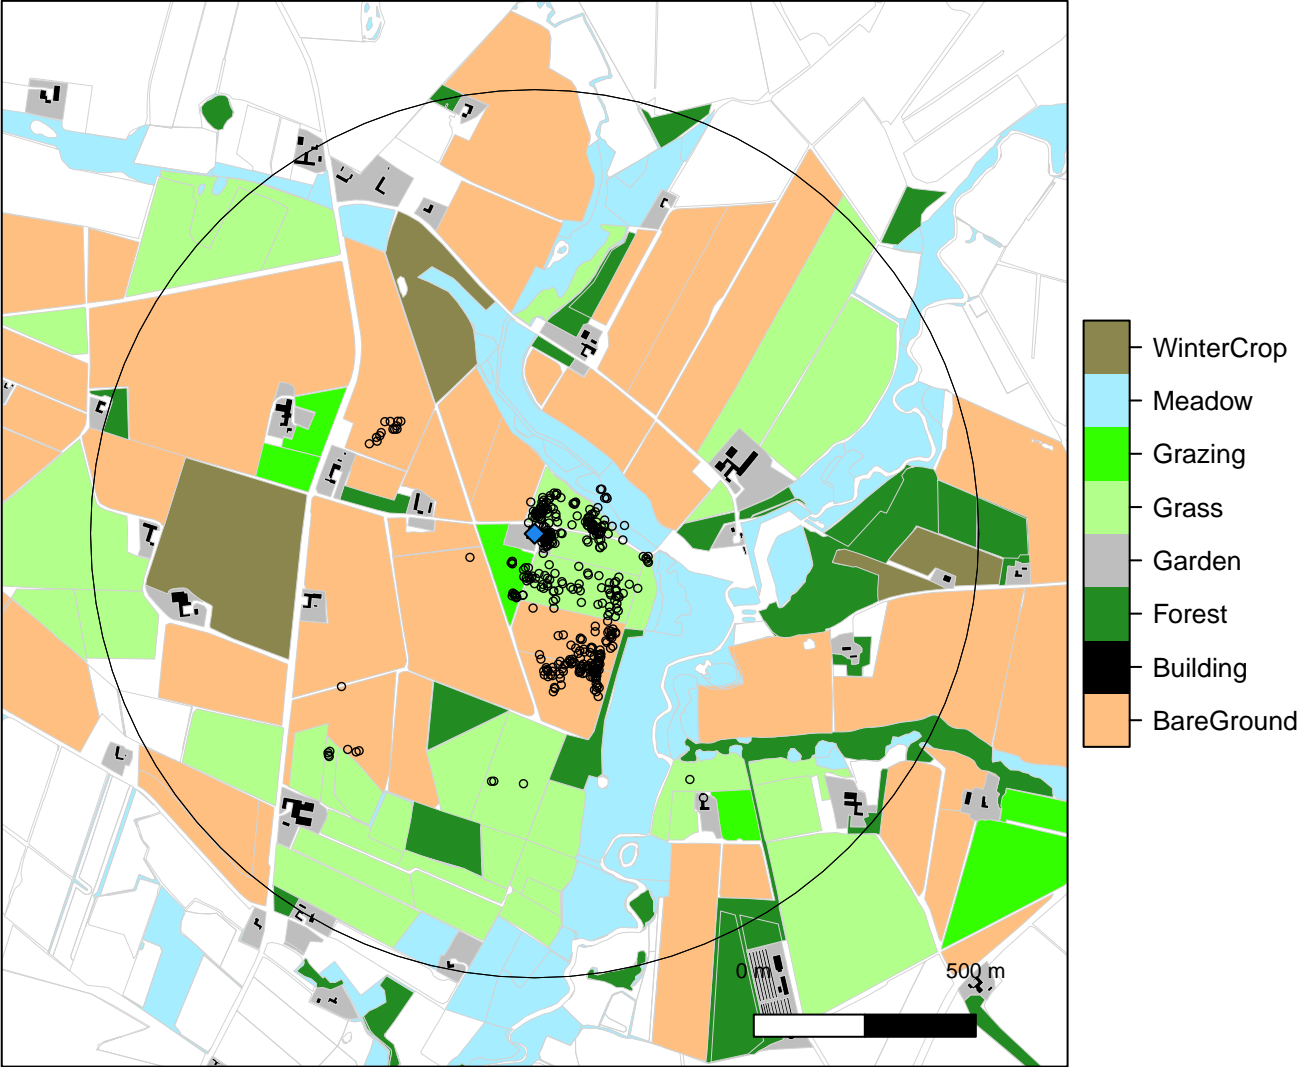

S4b-2016

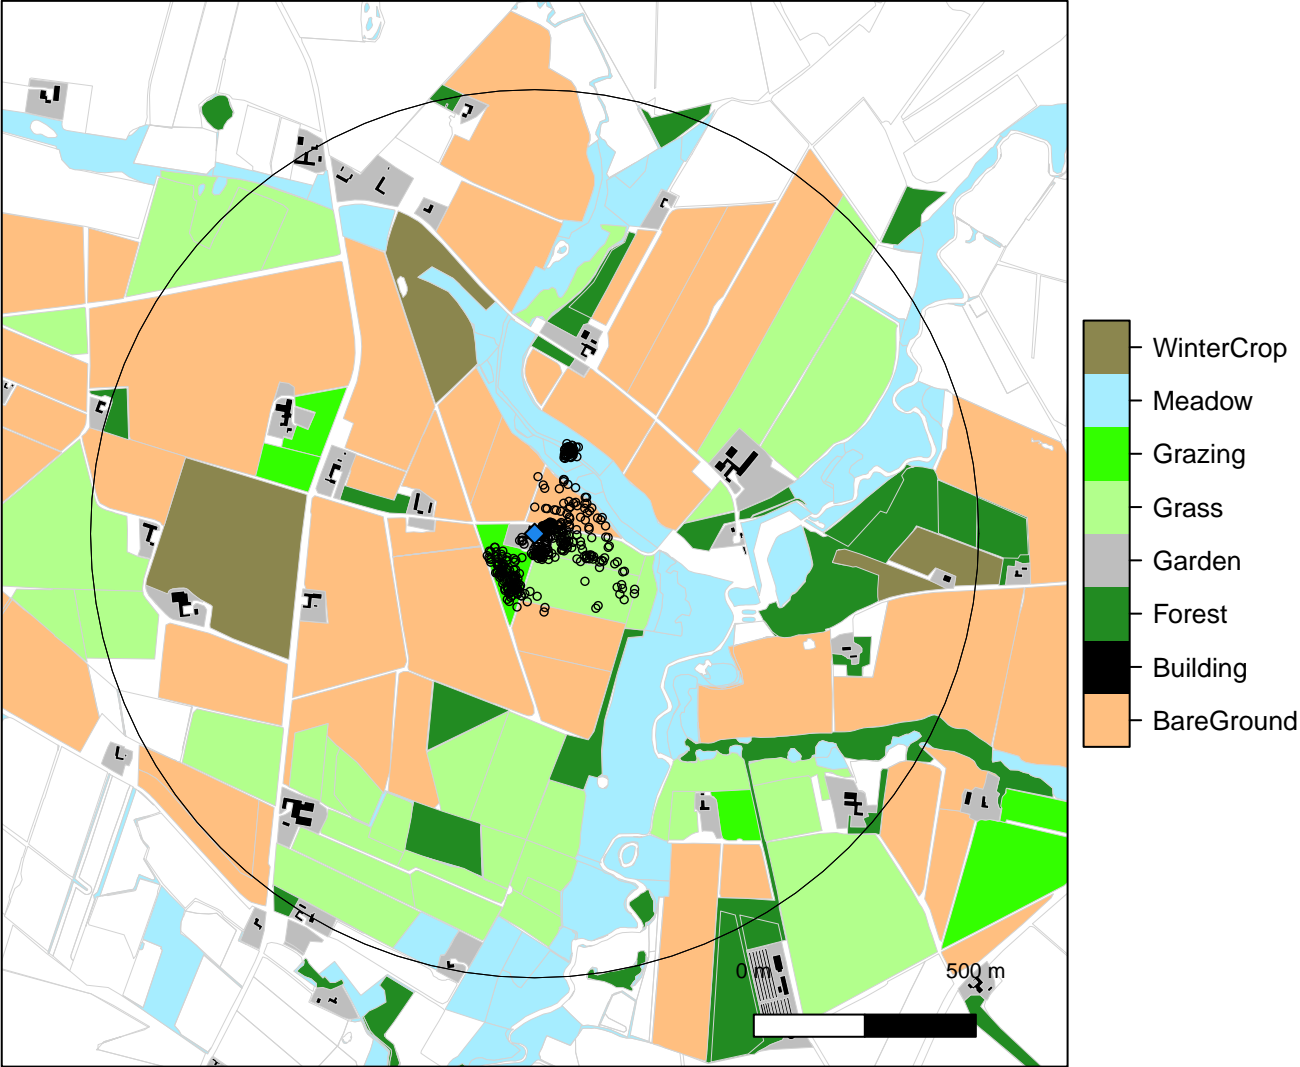

# S5-2015

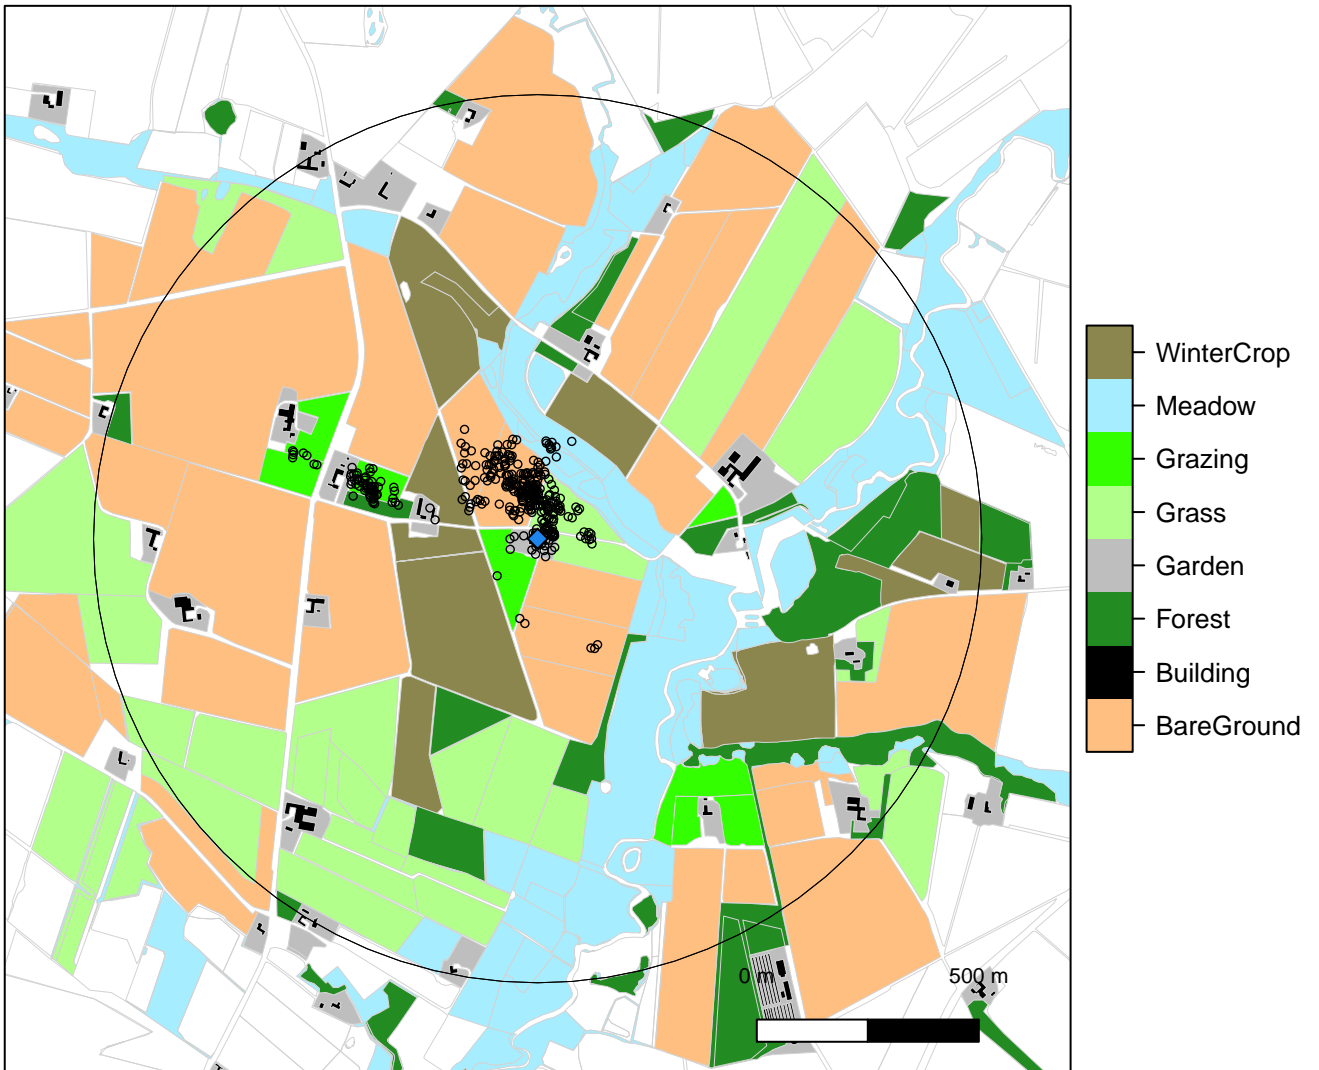

# S7-2015

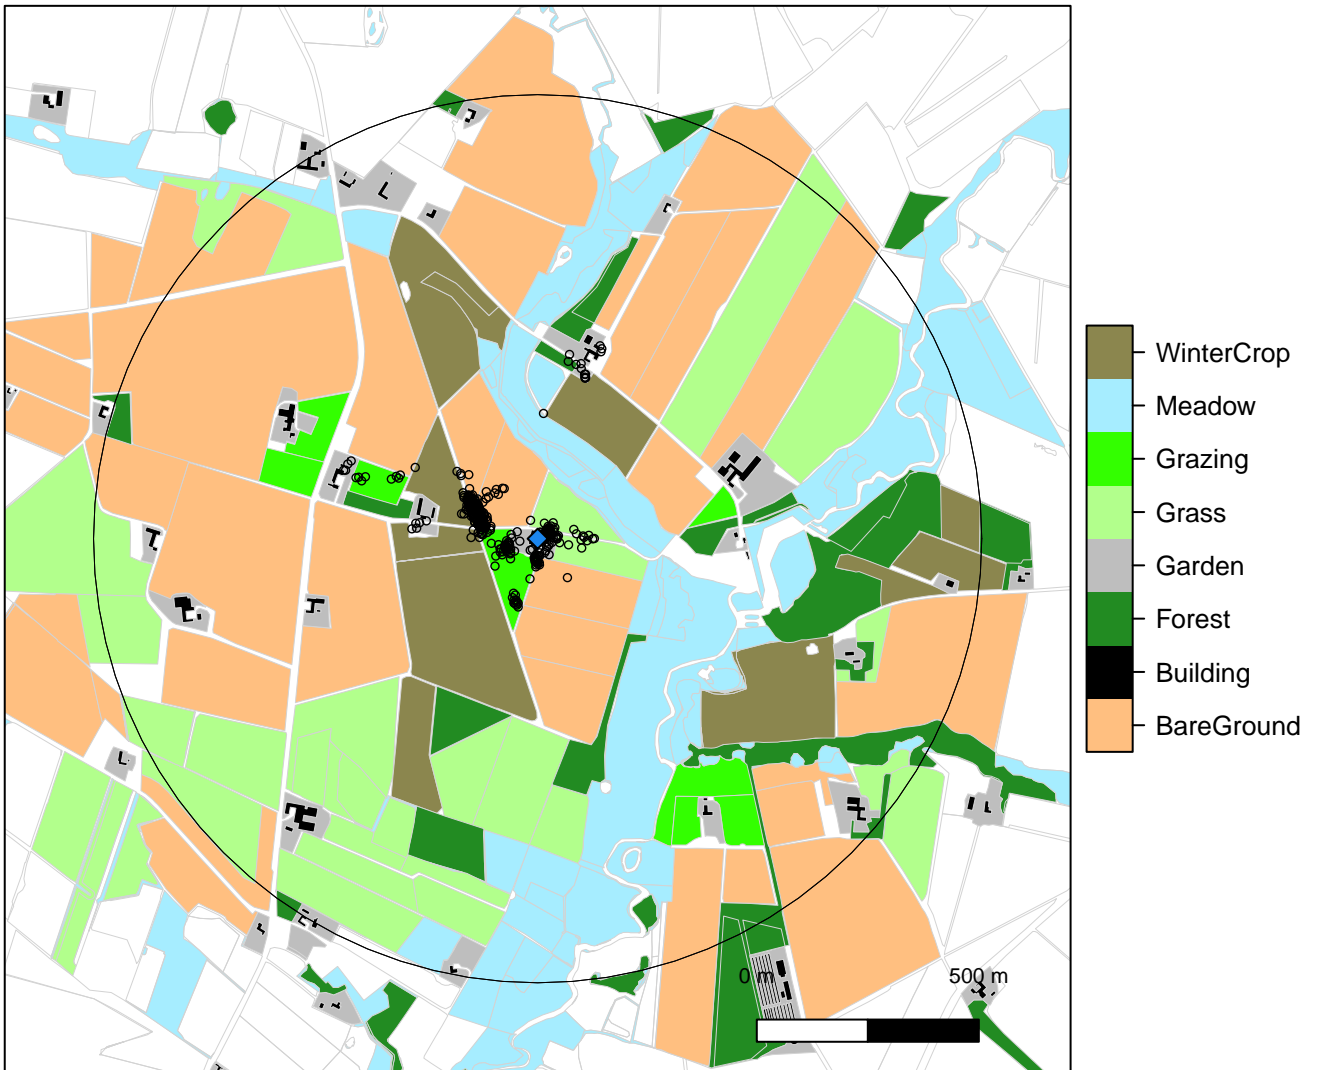

# S8-2015

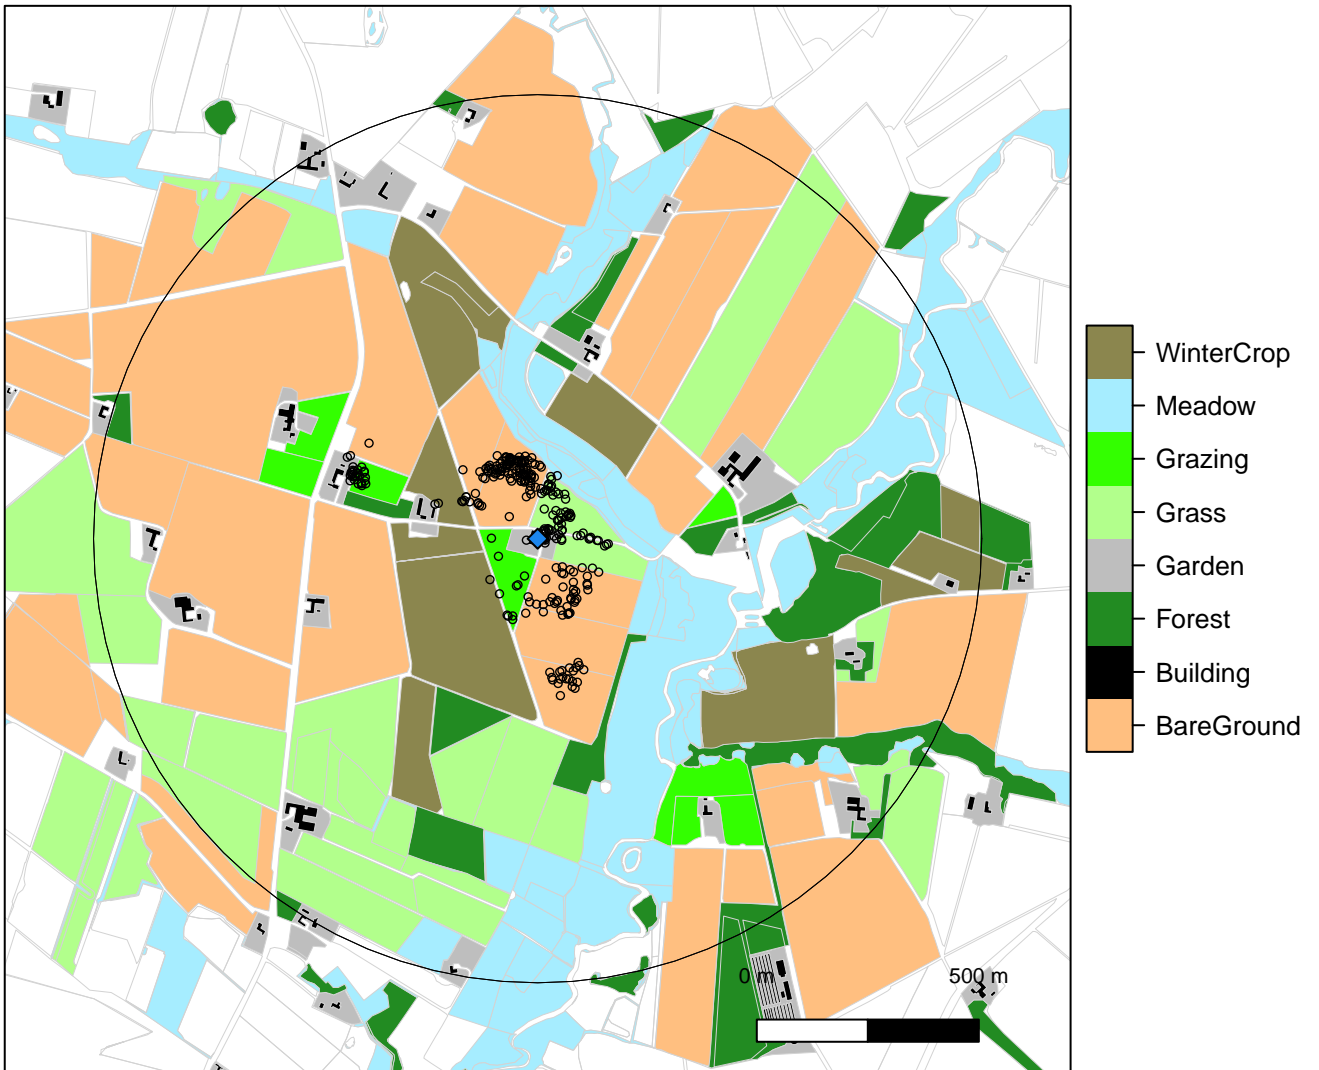

# S9-2015

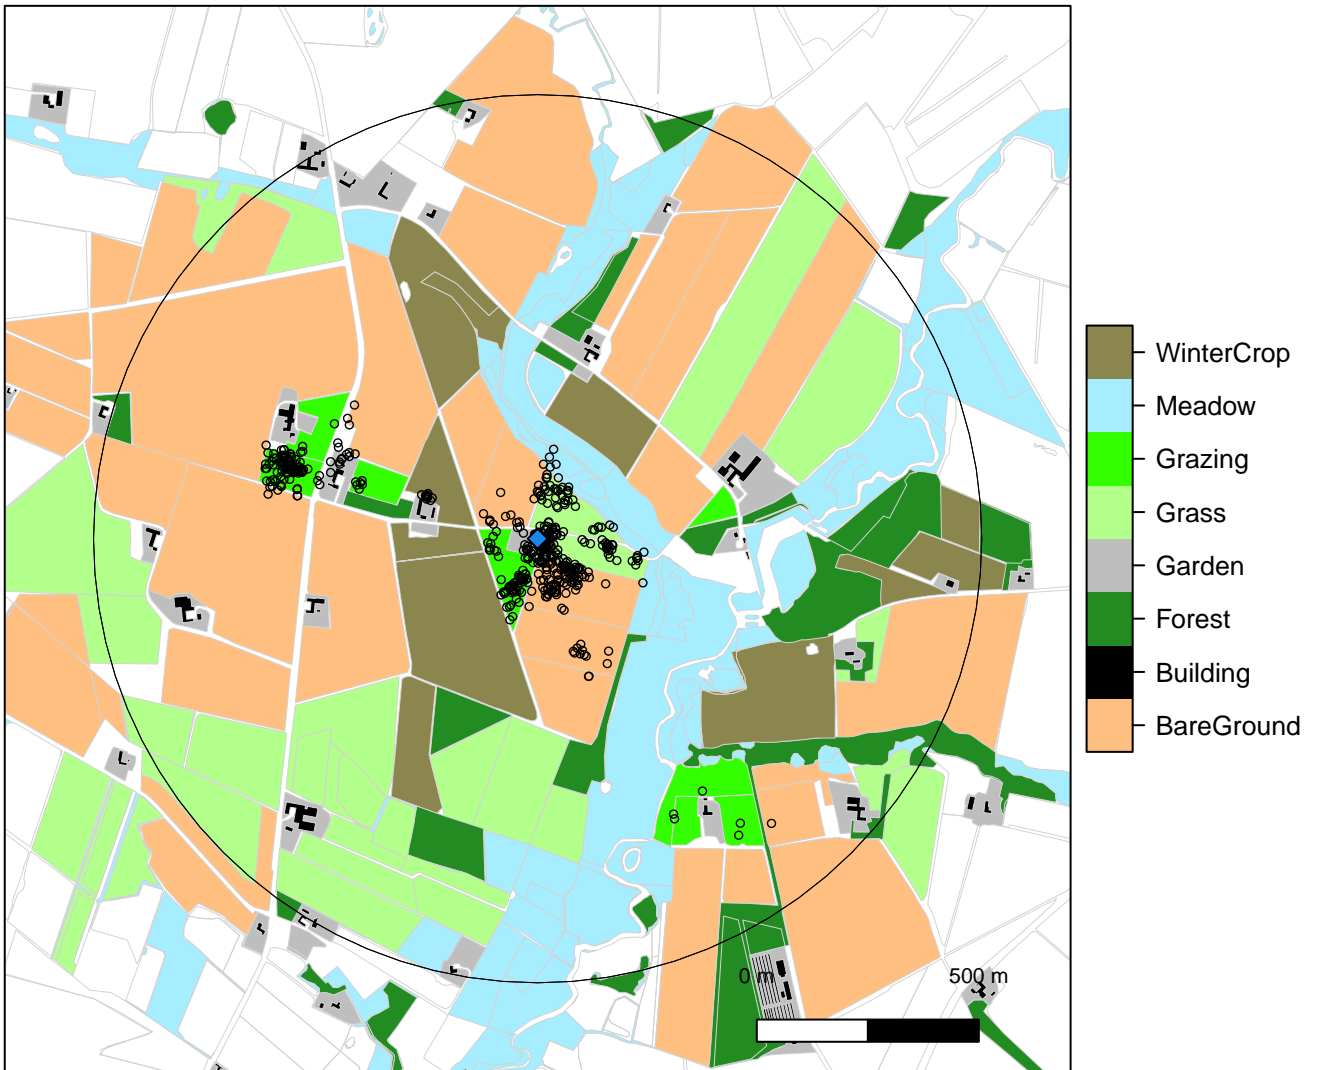



# S9a-2016

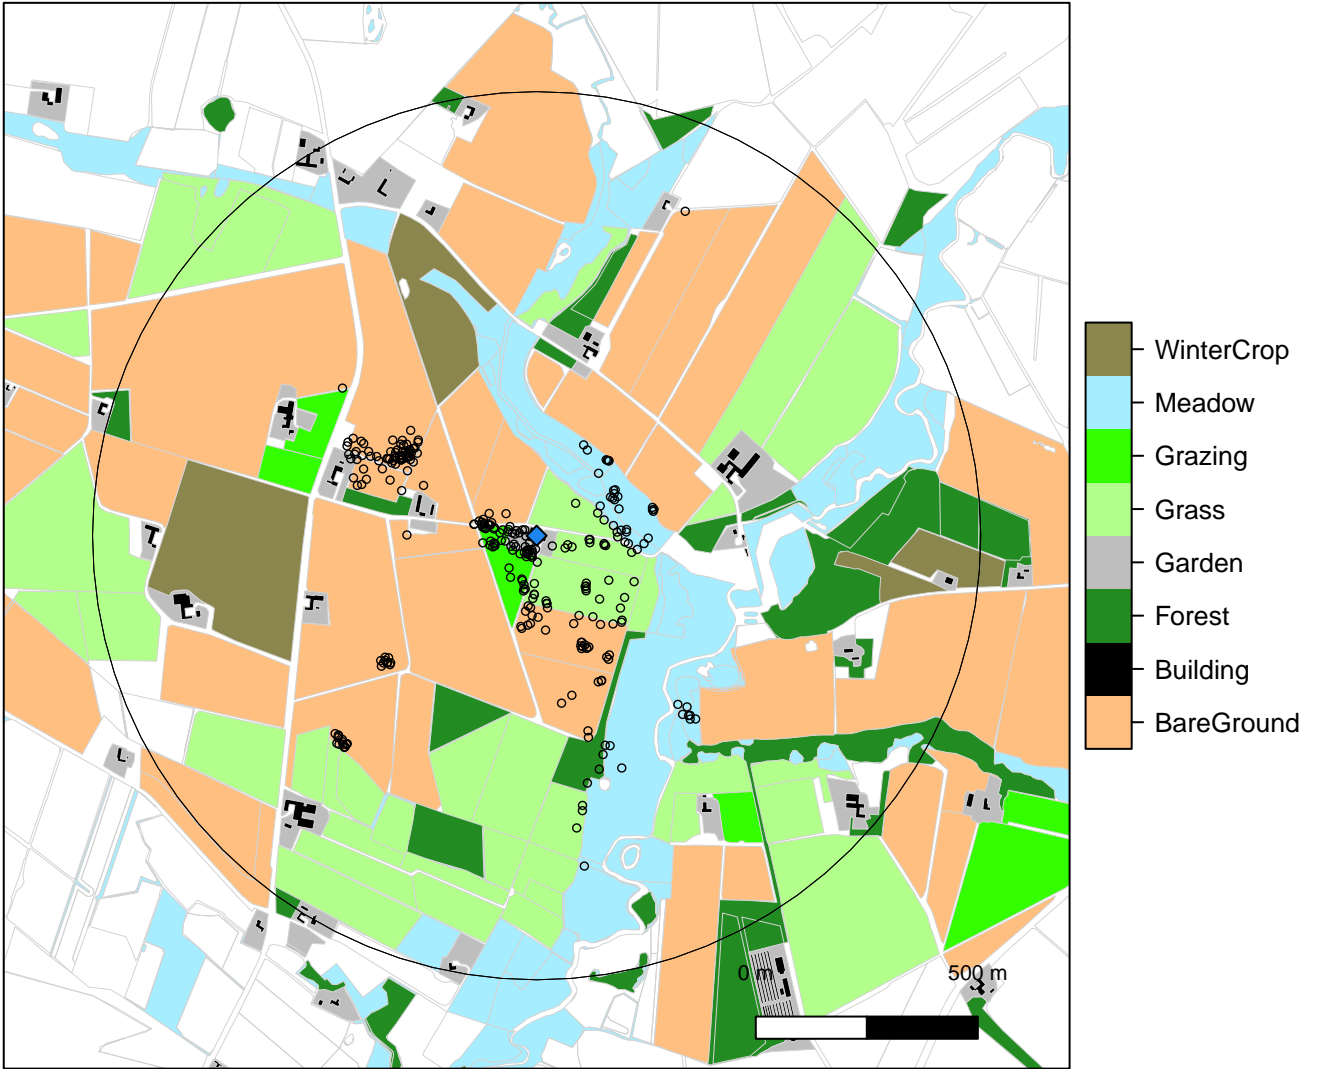

S9b-2016

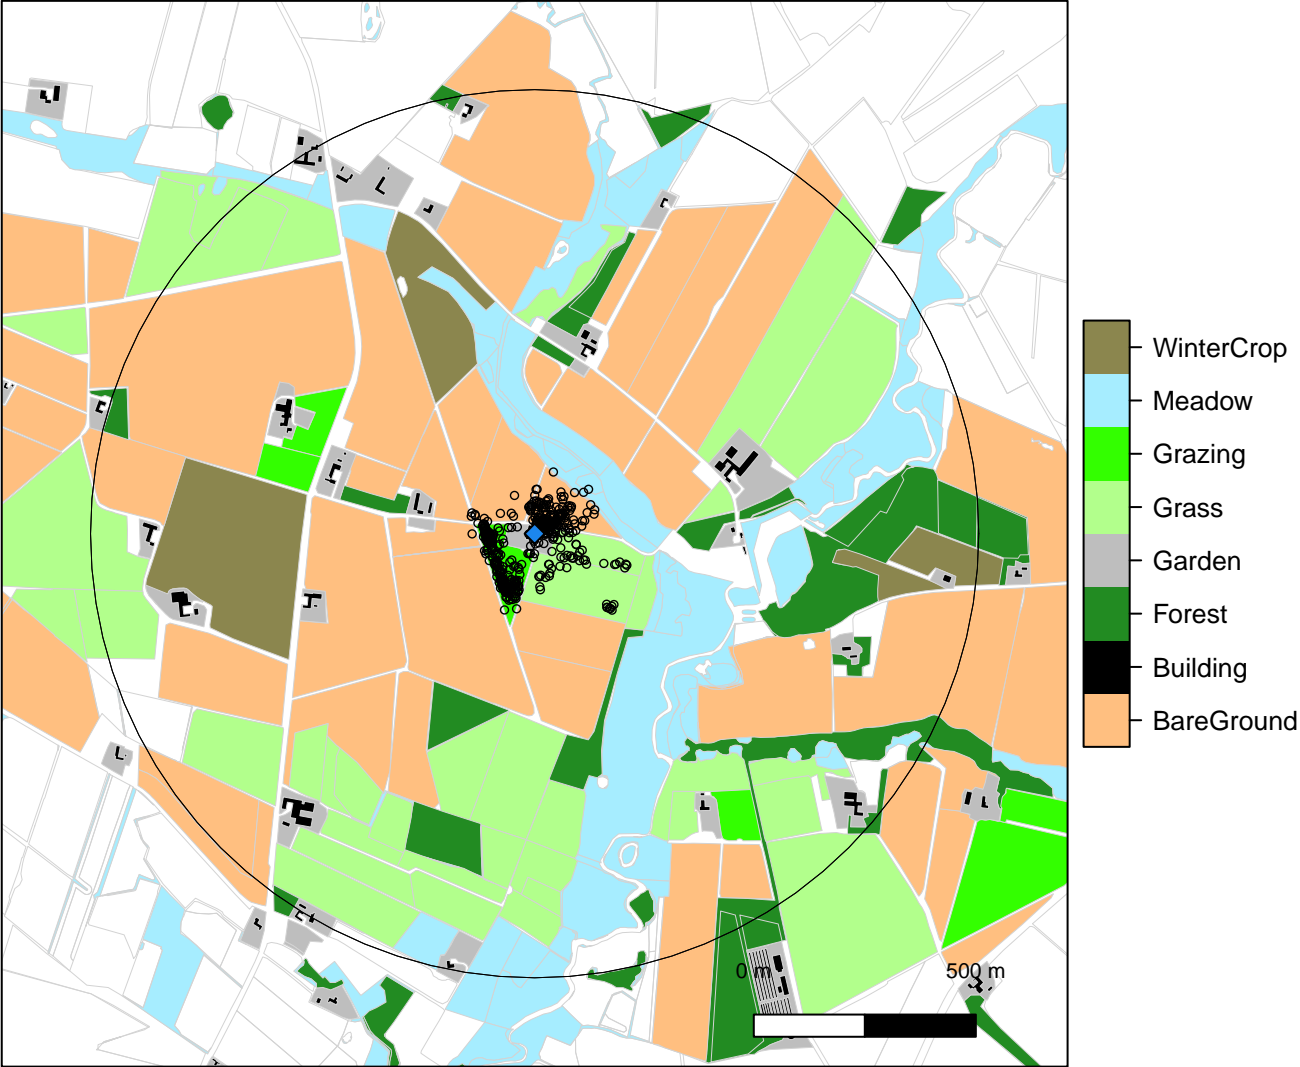

Supplement: pone.0182504.s001.pdf [file pone.0182504.s001.pdf]
